# Supplementary material
Source: PubMed Central journal article supplement (PMC2660634)
Supplement: tpc.108.061994_1.pdf [file tpc.108.061994_1.pdf]

Supplemental data. Lee et al. (2009). Drought stress-induced Rma1H1, a RING membrane-anchor E3 ubiquitin ligase homolog, regulates aquaporin levels via ubiquitination in transgenic *Arabidopsis* plants

- Co-localization : GKK + BiP:mRFP

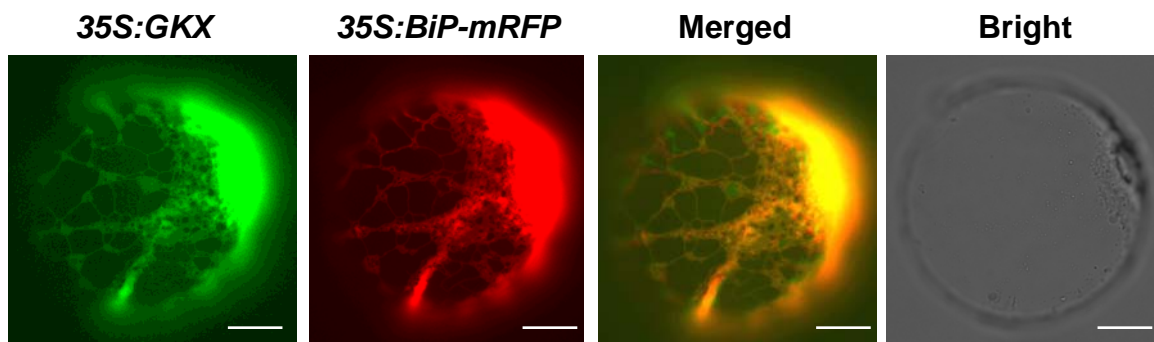

**Supplemental Figure 1. Localization of GKK to the ER.** Protoplasts were cotransformed with *GKK* and *BiP-mRFP*, and localization of these proteins was examined. Green fluorescent signals of GKK closely overlapped with the red fluorescent signals of BiP:mRFP in the network patterns, indicating that GKK localizes to the ER. Bars, 20  $\mu\text{m}$ .

Supplemental data. Lee et al. (2009). Drought stress-induced Rma1H1, a RING membrane-anchor E3 ubiquitin ligase homolog, regulates aquaporin levels via ubiquitination in transgenic *Arabidopsis* plants

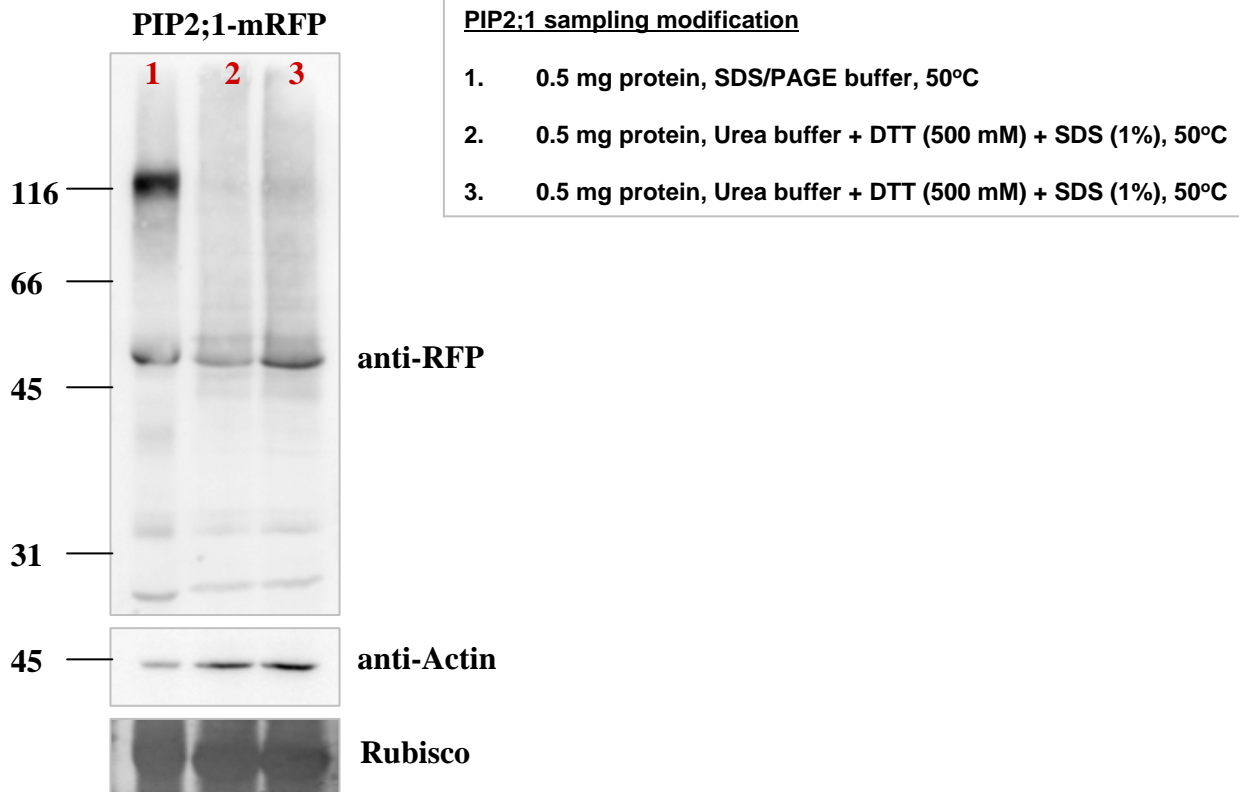

**Supplemental Figure 2. Solubilization of PIP2;1-mRFP by urea-containing denaturation buffer.** Protein extracts from protoplasts transformed with *PIP2;1-mRFP* was treated with regular SDS-PAGE buffer at 50°C or urea buffer (8 M urea, 50 mM Tris, pH 7.5, 250 mM sucrose, 1 mM MgCl<sub>2</sub>, 1 mM DTT and 3% Triton X-100) supplemented with 500 mM DTT and 1% SDS for 30 min at 50°C and separated by SDS-PAGE. The blot was immunostained with anti-mRFP antibody. Actin and RbcL detected by anti-actin antibody and Coomassie blue staining, respectively, were used as loading controls.

Supplemental data. Lee et al. (2009). Drought stress-induced Rma1H1, a RING membrane-anchor E3 ubiquitin ligase homolog, regulates aquaporin levels via ubiquitination in transgenic *Arabidopsis* plants

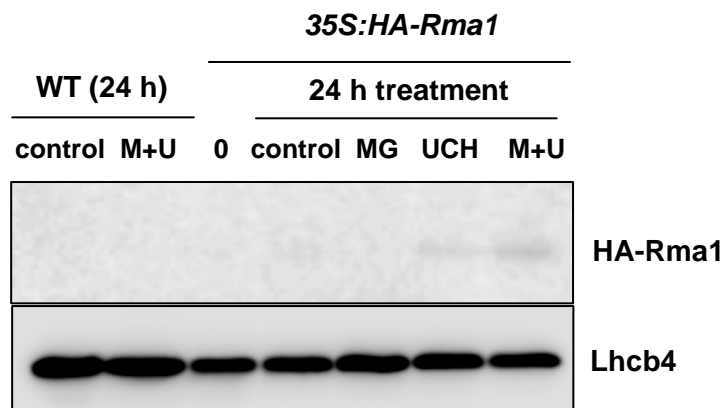

**Supplemental Figure 3. Expression of HA-Rma1 protein in 35S:HA-Rma1 Arabidopsis transgenic plants.** The 35S:HA-Rma1 Arabidopsis seedlings were incubated in the absence or presence of MG132 (25  $\mu$ M), UCH-L3 (10  $\mu$ M), or MG132 (25  $\mu$ M) + UCH-L3 (10  $\mu$ M), for 24 h, and then protein extracts were analyzed by immuno-blotting using anti-HA or anti-Lhcb4 antibody.

Supplemental data. Lee et al. (2009). Drought stress-induced Rma1H1, a RING membrane-anchor E3 ubiquitin ligase homolog, regulates aquaporin levels via ubiquitination in transgenic *Arabidopsis* plants

**A**

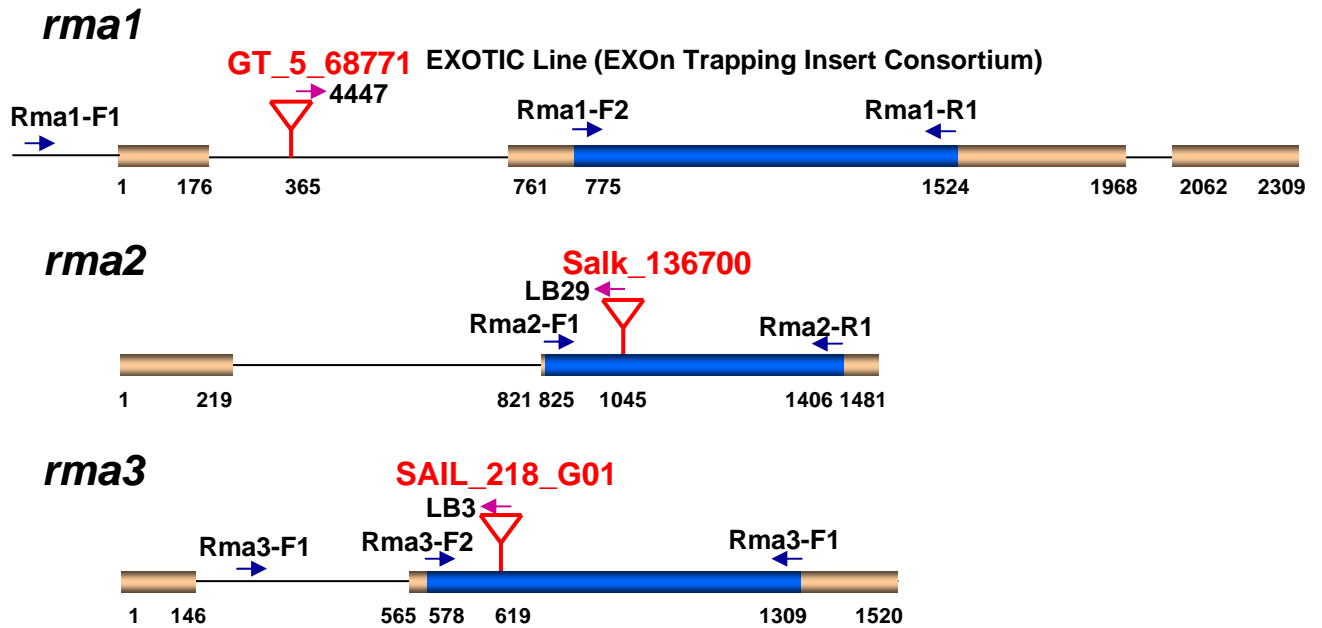

**B**

Genotyping PCR

Ler *rma1*

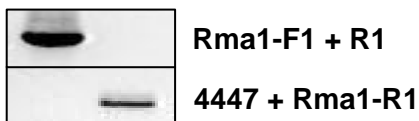

Col-0 *rma2*

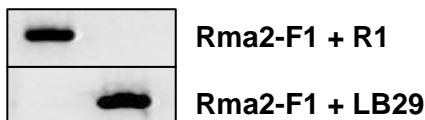

Col-0 *rma3*

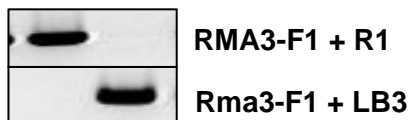

**C**

RT-PCR

Ler *rma1*

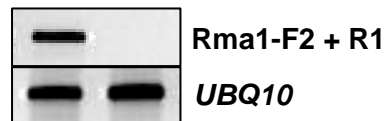

Col-0 *rma2*

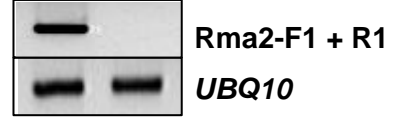

Col-0 *rma3*

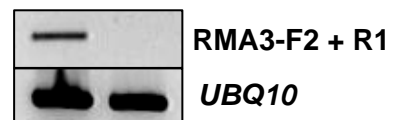

**Supplemental Figure 4. Molecular characterization of the *rma1*, *rma2* and *rma3* mutant lines.** (A) Schematic representation of the *rma1*, *rma2* and *rma3* alleles with the T-DNA insertion. The triangle represents the T-DNA. Blue bars indicate coding regions, while yellow bars show the 5'- and 3'-untranslated regions. Solid lines show introns. Gene-specific (forward and reverse) and T-DNA-specific (primer 4447, LB29 and LB3) primers used in the genotyping and RT-PCR are shown with arrows. (B) Genotyping of the *rma1*, *rma2* and *rma3* mutant plants. A set of gene-specific and T-DNA-specific primers used for genomic PCR are indicated in the right panel of agarose gel. (C) RT-PCR analysis of *Rma1*, *Rma2*, *Rma3* and *Ubiquitin10* mRNAs in wild type, *rma1*, *rma2*, and *rma3* plants. Primers used in genotyping PCR and RT-PCR are listed in Supplemental Table 1.

Supplemental data. Lee et al. (2009). Drought stress-induced Rma1H1, a RING membrane-anchor E3 ubiquitin ligase homolog, regulates aquaporin levels via ubiquitination in transgenic *Arabidopsis* plants

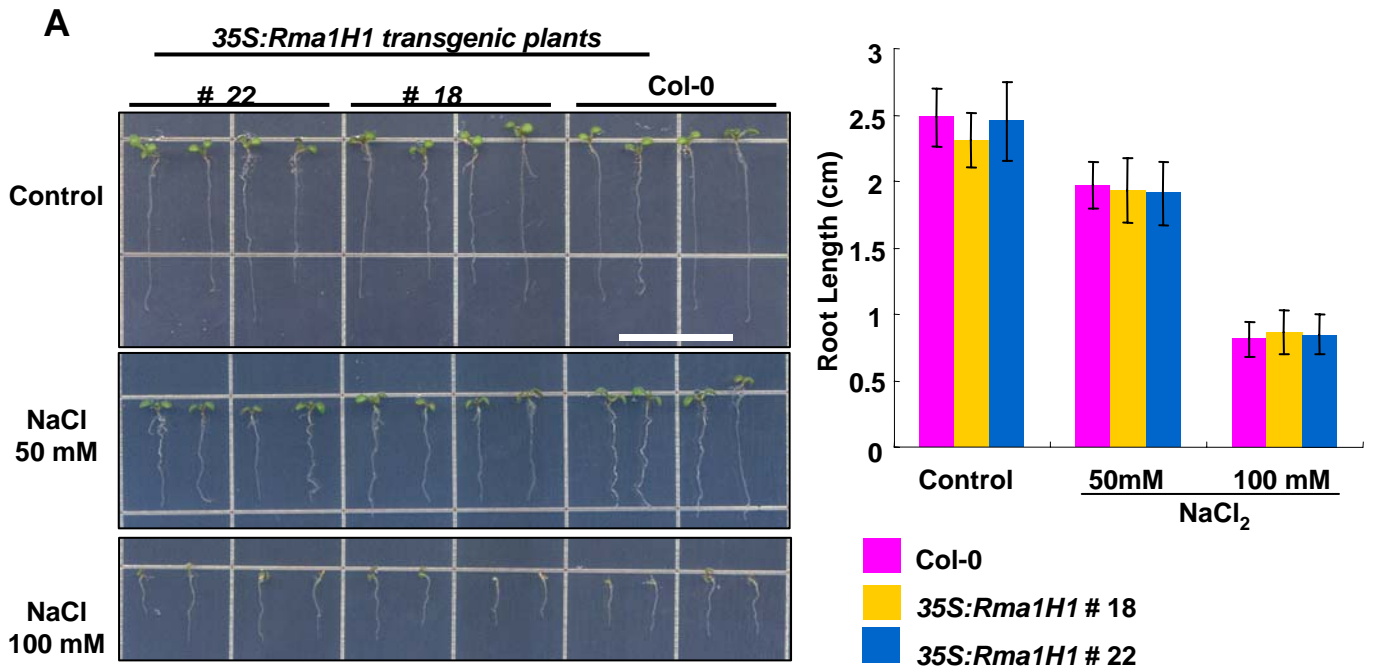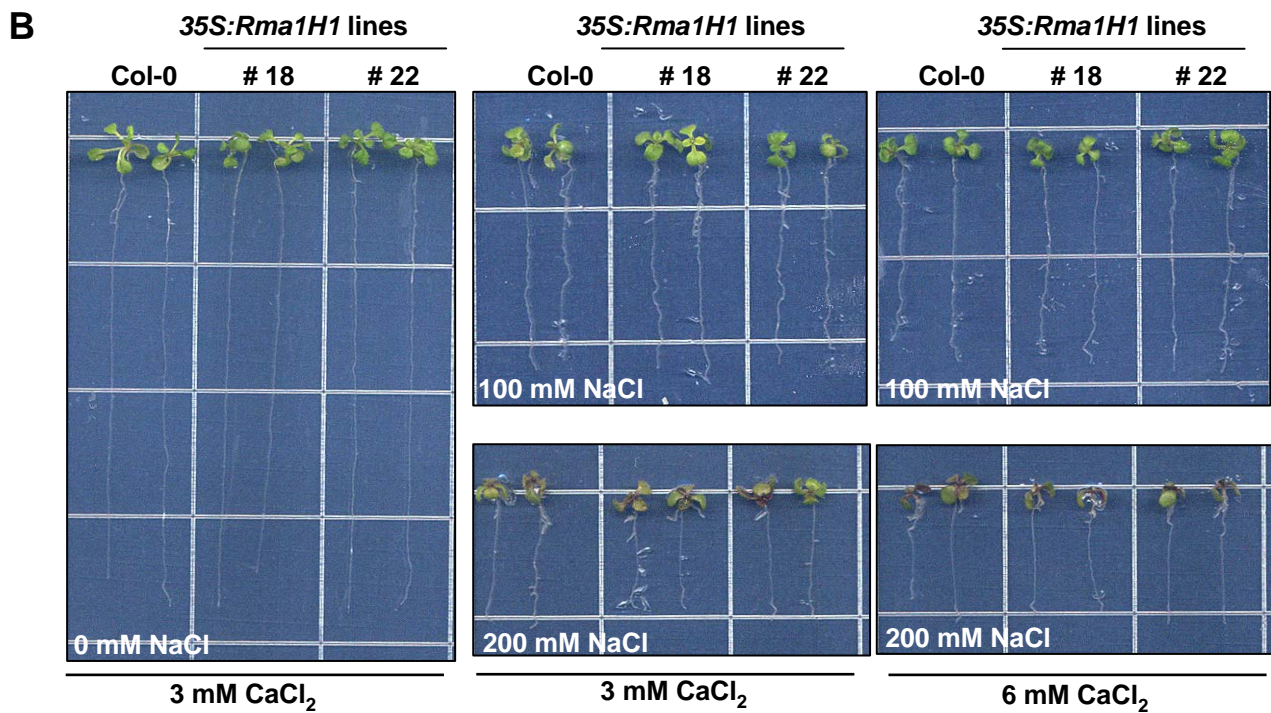

**Supplemental Figure 5. Root growth patterns of wild type and *35S:Rma1H1***

**transgenic plants in response to salt treatment.** To measure root growth, seeds of wild type and *35S:Rma1H1* T4 transgenic plants were sown on solid MS medium containing 3% (w/v) sucrose, 0.8% (w/v) phytoagar and different concentrations of CaCl<sub>2</sub> (0, 3, and 6 mM) without or with NaCl (50-100 mM). Plates containing seeds were incubated at 4°C for 3 days and then transferred to a growth chamber (22°C under a 16 h light/8 h dark regime) in a vertical orientation. Seedlings were further incubated in the growth chamber and then root length was monitored after 7 days.

**(A)** Root growth patterns of wild type and *35S:Rma1H1* transgenic plants in response to salt treatment without CaCl<sub>2</sub>. The values are means ±SD (n = 20). Bar, 1.8 cm

**(B)** Root growth patterns of wild type and *35S:Rma1H1* transgenic plants in response to salt treatment in the presence of CaCl<sub>2</sub> (3 and 6 mM).

Supplemental data. Lee et al. (2009). Drought stress-induced Rma1H1, a RING membrane-anchor E3 ubiquitin ligase homolog, regulates aquaporin levels via ubiquitination in transgenic *Arabidopsis* plants

**Supplemental Table 1. Primers for PCR, Cloning, and Construction of Transgenic Plants**

| Primer Name                                   | Forward Primers                      | Reverse Primers                         |
|-----------------------------------------------|--------------------------------------|-----------------------------------------|
| Rma1H1 F1 + R1                                | 5'-ATGGAAGTCAATGAACGATG-3'           | 5'-CTGCTGTTGATAACCTCGTC-3'              |
| Rma1H1 Full F + R                             | 5'-GAATTCATGAATCAAGATATGGCC-3'       | 5'-GAATTCTCAAAACAAGATTAGACATGTG-3'      |
| Rma1H1 <i>Bam</i> H1 F + <i>Sac</i> I R       | 5'-GAATTCGGAGGCTTTGCTTTTCT-3'        | 5'-GAGCTCTCAAAACAAGATTAGACATGTGAC-3'    |
| Rma1H1 <i>Sma</i> I F + <i>Bgl</i> II R       | 5'-AAGGGCCCATGAATCAAGATATGGCC-3'     | 5'-TTAGATCTTCAAAACAAGATTAGACATGT-3'     |
| Rma1H1 <i>Clal</i> F + <i>Xho</i> I R         | 5'-AAATCGATATGAATCAAGATATGGCC-3'     | 5'-TTCTCGAGTCAAAACAAGATTAGACA-3'        |
| Rma1H1 ΔN F                                   | 5'-GAATTCACCTTGATTCCACTCTATGG-3'     |                                         |
| Rma1H1 ΔC R                                   |                                      | 5'-GAATTCTCAGACTTCAGCCTTGCAAAC-3'       |
| Rma1H1 H58A F + R                             | 5'-TAACTTTATGCGGTGCTCTTTACTGCTGGC-3' | 5'-GCCAGCAGTAAAGAGCACCGCATAAAGTTA-3'    |
| Rma1H1 C61S F + R                             | 5'-GCGGTCATCTTTACAGCTGGCCTTGCAAT-3'  | 5'-AATGCAAGGCCAGCTGTAAAGATGAACGC-3'     |
| Rma1H1 C89S F + R                             | 5'-CGCAATGCCCTGTTAGCAAGGCTGAAGTC-3'  | 5'-GACTTCAGCCTTGCTAACAGGGCATTGCG-3'     |
| Rma1H1 K115R F + R                            | 5'-CCAAGATTCGGAGCCCTTCCTTCGGATGG-3'  | 5'-CCATCCGAAGGAAGGGCTCCGAATCTTGG-3'     |
| Rma1 F1 + R1                                  | 5'-GGCACTGACATTGACATATATGAGTTGG-3'   | 5'-CTAAACAAGAGAAGACACAGAACAAC-3'        |
| Rma1 F2                                       | 5'-ATGGCCTTAGATCAATCTTTTGAAG-3'      |                                         |
| Rma1 RNAi- <i>Xba</i> I F + <i>Hind</i> III R | 5'-TCTAGACAACGGGTTCAATTTCAATAGCCC-3' | 5'-AAGCTTCTAAACAAGAGAAGACACAGAACAAC-3'  |
| Rma1 RNAi- <i>Xho</i> I F + <i>Eco</i> RI R   | 5'-CTCGAGCAACGGGTTCAATTTCAATAGCCC-3' | 5'-GAATTCCTAAACAAGAGAAGACACAGAACAAC-3'  |
| Rma2 F1 + R1                                  | 5'-ATGGAGATTGAGAAGGATGAGGACG-3'      | 5'-TTAGAAGAGAAATAGACACATAAACAT-3'       |
| Rma2 RNAi- <i>Hind</i> III F + <i>Clal</i> R  | 5'-AAGCTTCAGTCCGGTTCAAATGTACCGAG-3'  | 5'-ATCGATTTAGAAGAGAAATAGACACATAAACAT-3' |
| Rma2 RNAi- <i>Eco</i> RI F + <i>Kpn</i> I R   | 5'-GAATTCAGTCCGGTTCAAATGTACCGAG-3'   | 5'-GGTACCTTAGAAGAGAAATAGACACATAAACAT-3' |
| Rma3 F1 + R1                                  | 5'-TAGTGGATGGGAAGATATTTAGATAGAG-3'   | 5'-CTAGAAGAGAAGGAGGCAAAGGATGAT-3'       |
| Rma3 F2                                       | 5'-ATGGAAGGAACTTCTTCATCAGGT-3'       |                                         |
| PIP2;1 F + R                                  | 5'-GAATTCATGGCAAAGGATGTGGAA-3'       | 5'-GAATTCCTTAGACGTTGGCAGCAC-3'          |
| PIP2;1 <i>Xho</i> I F + <i>Bam</i> HI R       | 5'-AACTCGAGATGGCAAAGGATGTGGAA-3'     | 5'-GGATCCGACGTTGGCAGCACTTCTGAA-3'       |
| UBA1 F + R                                    | 5'-GAATTCATGCTTCACAAGCGAGC-3'        | 5'-GAATTCTCACCTGAAGTAGATAG-3'           |
| UBC8 F + R                                    | 5'-GAATTCATGGCTTCGAAACGGATC-3'       | 5'-GAATTCTTAGCCCATGGCATACTT-3'          |
| UBQ10 F + R                                   | 5'-TCAATTCTCTTACCGTGATCAAG-3'        | 5'-CTTCTTAAGCATAACAGAGACGAG-3'          |
| Ubiquitin F + R                               | 5'-ATGCAGATCTTTGTTAAGACTCTC-3'       | 5'-TCAACCACCACGGAGCCTGA-3'              |
| PINII F + R                                   | 5'-GTGCCGAATTCGGCACGA-3'             | 5'-CTGTGTGAAGGTACGTACGGC-3'             |
| LEAL1 F + R                                   | 5'-GCACGAGGGACTTGAGCA-3'             | 5'-GTGATGTTGCCAATGACTGG-3'              |
| RCI                                           | 5'-CAACAGAAATGTTTTGGAACCC-3'         | 5'-CCATATGATGATCAATCACTTGGT-3'          |
| Actin F + R ( <i>Arabidopsis</i> )            | 5'-TACTGATTACCTCATGAAGATCCTTAC-3'    | 5'-AAACGATGTCTCTTTAGTTTGAAGC-3'         |
| T-DNA border                                  |                                      |                                         |
| 4447                                          | 5'-CCGTTTCCGTTCCGTTTTTC-3'           |                                         |
| LB29                                          | 5'-ATTTCCGGAACCACCATCAAACAGGATTT-3'  |                                         |
| LB3                                           | 5'-ACGGTCGGTACGGGATTTTCCCAT-3'       |                                         |
